# Supplementary material for: Persistent neural activity in auditory cortex is related to auditory working memory in humans and nonhuman primates
Source: eLife. 2016 Jul 20;5:e15441. doi: 10.7554/eLife.15441 (PMC4974052; doi:10.7554/eLife.15441)
Supplement: Figure 4—source data 1. — The table shows numbers and percentages (in brackets) of recording sites where the neuronal activity during the final 500 ms of the delay was significantly different in high- and low-WM-load trials with the same S1s (p<0.05, permutation test). Numbers of sites with significant differences in spike activity in core fields of AC, in the LFP in core fields of AC, and in spike activity in vlPFC are presented in rows. Numbers of sites with a significant difference only when S1 was A (tone A only), only when S1 was B (tone B only), or when S1 was A and when it was B (tones A and B), are presented in separate columns. The total number of recording sites was 307 for spike activity in core fields of AC, 310 for the LFP in core fields of AC, and 238 for spike activity in vlPFC. DOI: http://dx.doi.org/10.7554/eLife.15441.009 [file elife-15441-fig4-data1.xlsx]

## Sheet: Sheet1
Figure 4 - source data 1
	tone A only	tone B only	tones A and B
AC core fields, spike activity	92 (30.0%)	48 (15.6%)	60 (19.5%)
AC core fields, LFP	75 (24.2%)	69 (22.3%)	31 (10.0%)
vlPFC, spike activity	66 (27.7%)	43 (18.1%)	71 (29.8%)
