# Supplementary figures and images for: Persistent neural activity in auditory cortex is related to auditory working memory in humans and nonhuman primates
Source: eLife journal article supplement (doi:10.7554/elife.15441), 2016-07-20

Figure 5 - figure supplement 1

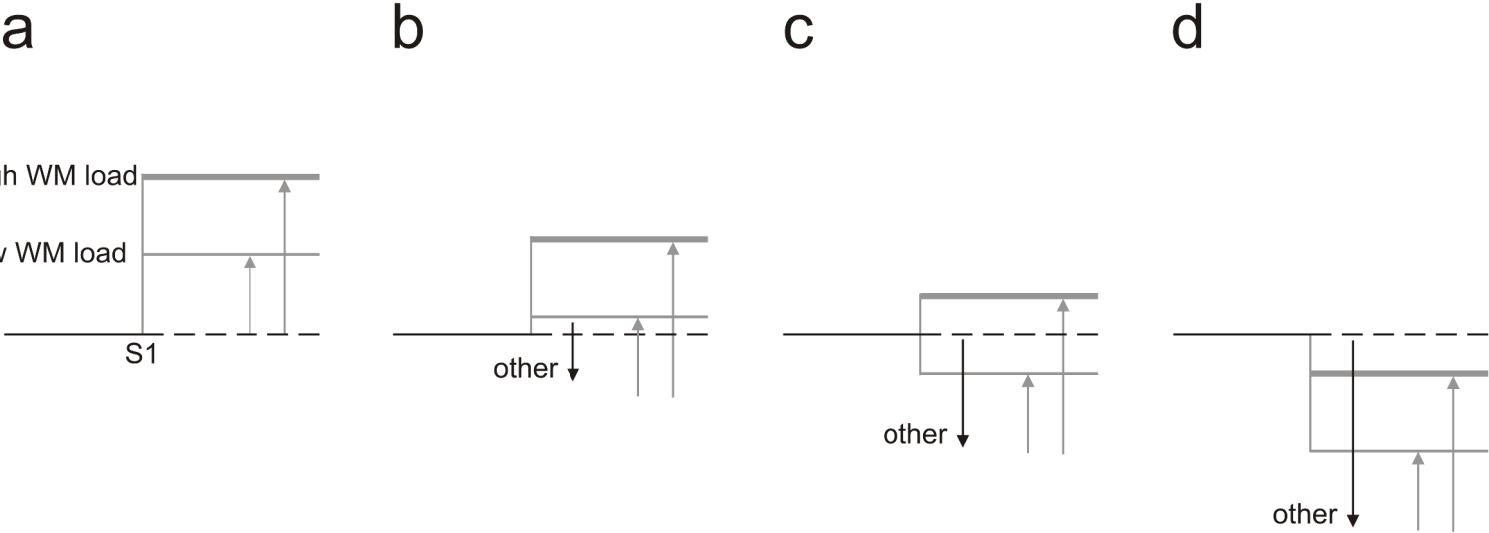

Supplement: supp [file elife-15441-supp-v1.zip]

Figure 1 - figure supplement 3

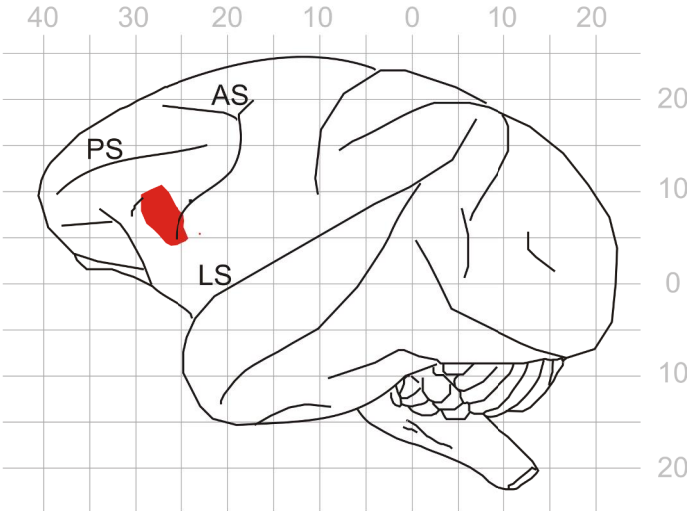

Supplement: supp [file elife-15441-supp-v1.zip]

Figure 1 - figure supplement 2

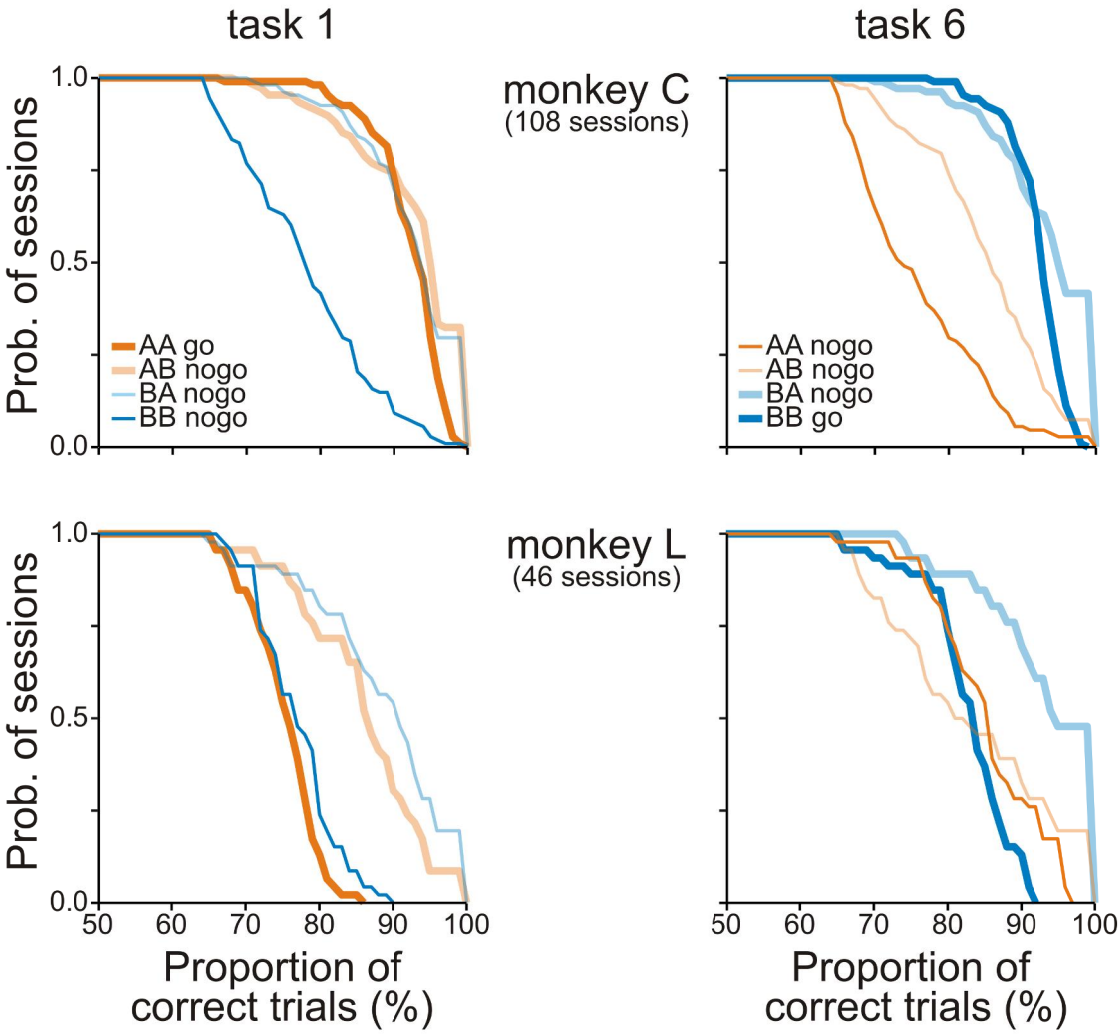

Supplement: supp [file elife-15441-supp-v1.zip]

Figure 4 - figure supplement 1

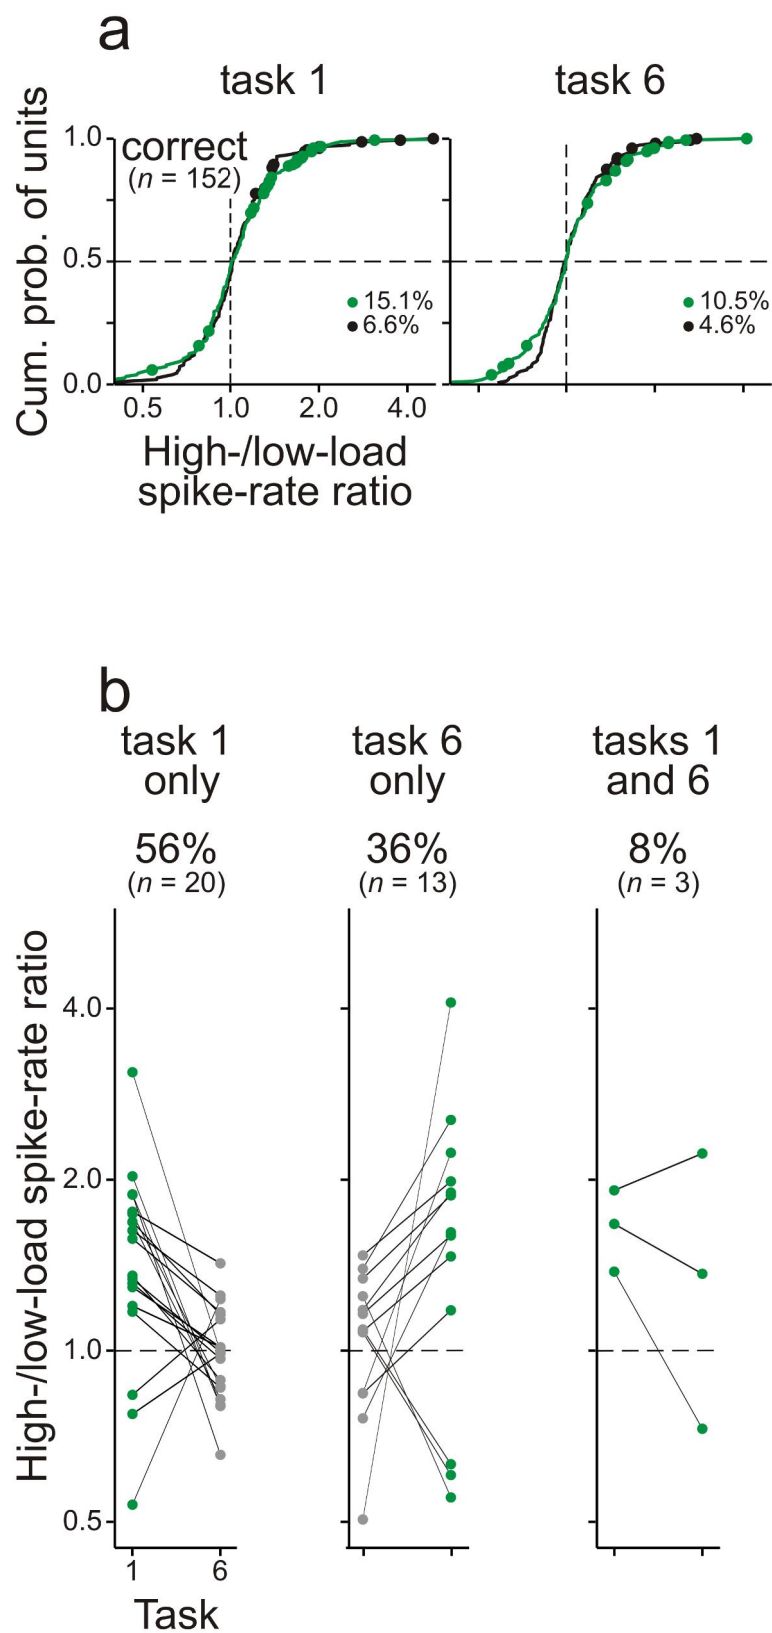

Supplement: supp [file elife-15441-supp-v1.zip]

Figure 1 - figure supplement 1

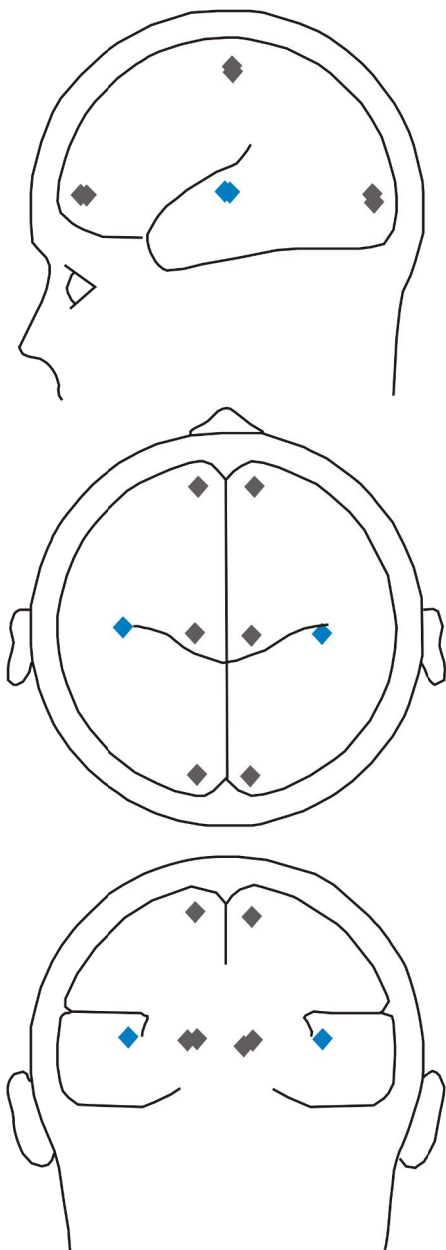

Supplement: supp [file elife-15441-supp-v1.zip]
